# Supplementary material
Source: MDPI journal article supplement (https://www.mdpi.com/2225-1154/10/8/123)
Supplement: s1 [file s1]

Archive with 3 entries (3 files):
- Suplementary Material 3.pdf
- Supplementary Material 1.pdf
- Supplementary Material 2.pdf
