# Supplementary material
Source: MDPI journal article supplement (https://www.mdpi.com/2225-1154/10/8/123)
Supplement: s1 [file s1 › Supplementary Material 1.pdf]

## Supplementary Material 1: Improving Future Estimation of Cheliff-Mactaa-Tafna Stream-flow via an Ensemble of Bias Correction Approaches.

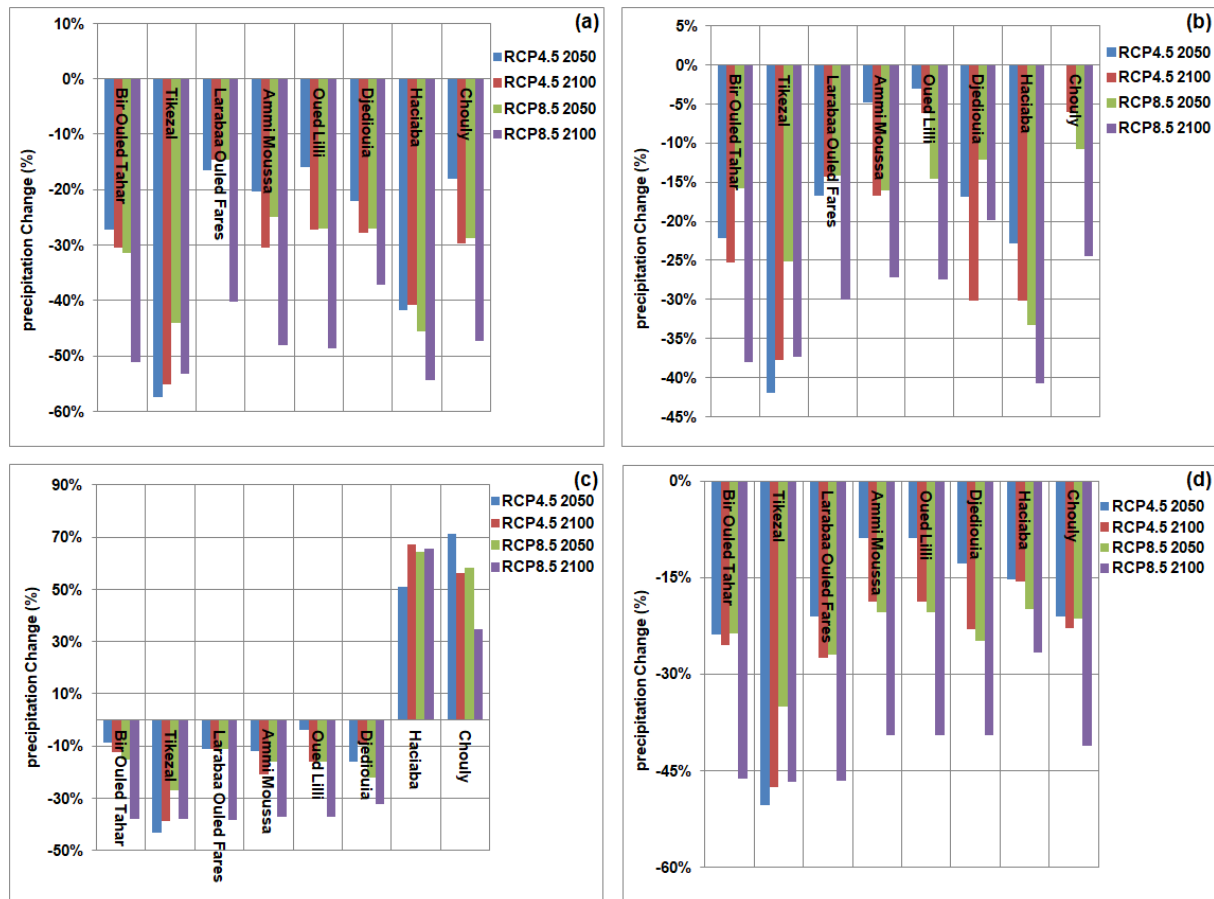

**Figure S1** Changes in annual precipitation under tow scenarios (RCP4.5 and RCP8.5), (a) Quantile Mapping, (b) Scaled Distribution Mapping, (c) Quantile Delta Mapping and (d) Model (RAW).

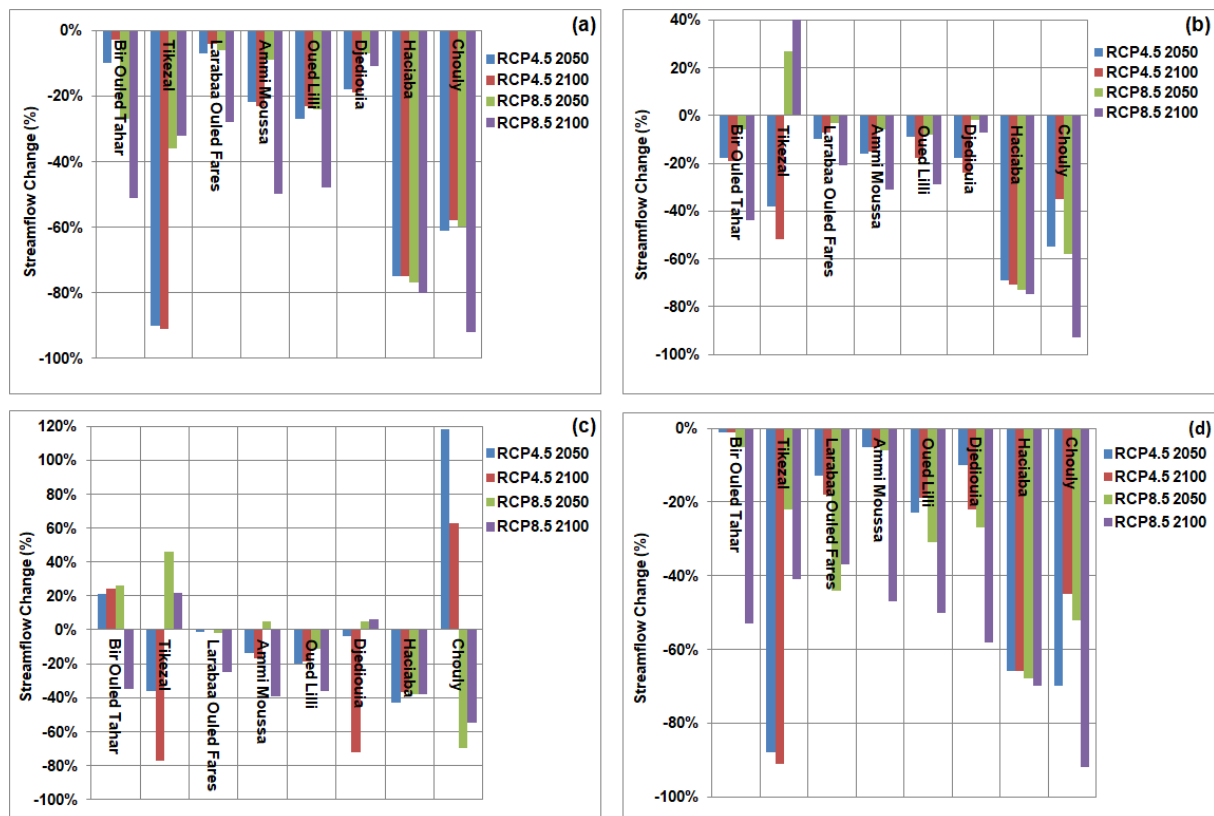

**Figure S2** Changes in annual streamflow under tow scenarios (RCP4.5 and RCP8.5), (a) Quantile Mapping, (b) Scaled Distribution Mapping, (c) Quantile Delta Mapping and (d) Model (RAW).
