# Supplementary material
Source: MDPI journal article supplement (https://www.mdpi.com/2225-1154/10/8/123)
Supplement: s1 [file s1 › Supplementary Material 2.pdf]

## Supplementary Material 2: Improving Future Estimation of Cheliff-Mactaa-Tafna Stream-flow via an Ensemble of Bias Correction Approaches.

**Table S1** Evapotranspiration changes on future time horizons: 2050 and 2100.

| Stations            | RCP4.5 2050 | RCP4.5 2100 | RCP8.5 2050 | RCP8.5 2100 |
|---------------------|-------------|-------------|-------------|-------------|
| Bir Ouled Tahar     | 36%         | 53%         | 31%         | 79%         |
| Tikezal             | 33%         | 47%         | 29%         | 77%         |
| Larabaa Ouled Fares | 35%         | 49%         | 32%         | 79%         |
| Ammi Moussa         | 41%         | 56%         | 38%         | 92%         |
| Oued Lilli          | 41%         | 56%         | 38%         | 92%         |
| Djediouia           | 39%         | 54%         | 36%         | 87%         |
| Haciaba             | 41%         | 57%         | 36%         | 94%         |
| Chouly              | 33%         | 47%         | 29%         | 77%         |

### Projected season precipitation

**Table S2** Change in mean seasonal (autumn) precipitation projection in CMT basins from the baseline period (1975–2012).

| STATIONS            | Autumn                       |        |        |        |                                   |        |        |        |
|---------------------|------------------------------|--------|--------|--------|-----------------------------------|--------|--------|--------|
|                     | Quantile Mapping (QM)        |        |        |        | Scaled Distribution Mapping (SDM) |        |        |        |
|                     | RCP4.5                       | RCP4.5 | RCP8.5 | RCP8.5 | RCP4.5                            | RCP4.5 | RCP8.5 | RCP8.5 |
|                     | 2050                         | 2100   | 2050   | 2100   | 2050                              | 2100   | 2050   | 2100   |
| Bir Ouled Tahar     | -16%                         | -29%   | -31%   | -48%   | -7%                               | -26%   | -11%   | -28%   |
| Tikezal             | -45%                         | -55%   | -49%   | -53%   | -25%                              | -38%   | -29%   | -27%   |
| Larabaa Ouled Fares | -25%                         | -28%   | -23%   | -46%   | -25%                              | -16%   | -20%   | -23%   |
| Ammi Moussa         | -16%                         | -17%   | -26%   | -41%   | 13%                               | 4%     | -11%   | -10%   |
| Oued Lilli          | 8%                           | -17%   | -26%   | -41%   | 17%                               | 18%    | -11%   | -10%   |
| Djediouia           | -31%                         | -29%   | -37%   | -47%   | -18%                              | -21%   | -5%    | 3%     |
| Haciaba             | -62%                         | -58%   | -68%   | -59%   | -50%                              | -44%   | -56%   | -48%   |
| Chouly              | -15%                         | -26%   | -31%   | -43%   | 4%                                | 1%     | -11%   | -12%   |
| STATIONS            | Quantile Delta Mapping (QDM) |        |        |        | Model (RAW)                       |        |        |        |
|                     | RCP4.5                       | RCP4.5 | RCP8.5 | RCP8.5 | RCP4.5                            | RCP4.5 | RCP8.5 | RCP8.5 |
|                     | 2050                         | 2100   | 2050   | 2100   | 2050                              | 2100   | 2050   | 2100   |
|                     | 2050                         | 2100   | 2050   | 2100   | 2050                              | 2100   | 2050   | 2100   |
| Bir Ouled Tahar     | 6%                           | -10%   | -14%   | -32%   | -12%                              | -25%   | -22%   | -41%   |
| Tikezal             | -26%                         | -38%   | -31%   | -37%   | -35%                              | -47%   | -39%   | -43%   |
| Larabaa Ouled Fares | -23%                         | -25%   | -20%   | -45%   | -24%                              | -37%   | -33%   | -52%   |
| Ammi Moussa         | -4%                          | -5%    | -14%   | -29%   | 14%                               | -5%    | -18%   | -29%   |
| Oued Lilli          | 21%                          | -5%    | -14%   | -29%   | 14%                               | -5%    | -18%   | -29%   |
| Djediouia           | -26%                         | -25%   | -34%   | -43%   | -7%                               | -28%   | -29%   | -44%   |
| Haciaba             | 75%                          | 93%    | 77%    | 91%    | -26%                              | -21%   | -31%   | -23%   |
| Chouly              | 79%                          | 65%    | 59%    | 43%    | -4%                               | -3%    | -6%    | -17%   |

**Table S3** Change in mean seasonal (Winter) precipitation projection in CMT basins from the baseline period (1975–2012).

| Winter              |                              |        |        |        |                                   |        |        |        |
|---------------------|------------------------------|--------|--------|--------|-----------------------------------|--------|--------|--------|
| STATIONS            | Quantile Mapping (QM)        |        |        |        | Scaled Distribution Mapping (SDM) |        |        |        |
|                     | RCP4.5                       | RCP4.5 | RCP8.5 | RCP8.5 | RCP4.5                            | RCP4.5 | RCP8.5 | RCP8.5 |
|                     | 2050                         | 2100   | 2050   | 2100   | 2050                              | 2100   | 2050   | 2100   |
| Bir Ouled Tahar     | -22%                         | -22%   | -35%   | -36%   | -15%                              | -25%   | -27%   | -41%   |
| Tikezal             | -52%                         | -56%   | -49%   | -45%   | -35%                              | -43%   | -34%   | -47%   |
| Larabaa Ouled Fares | -10%                         | -3%    | -15%   | -21%   | -19%                              | -18%   | -22%   | -34%   |
| Ammi Moussa         | -23%                         | -32%   | -34%   | -36%   | -10%                              | -27%   | -23%   | -24%   |
| Oued Lilli          | -16%                         | -21%   | -34%   | -36%   | -10%                              | -18%   | -21%   | -24%   |
| Djediouia           | -15%                         | -30%   | -26%   | -17%   | -29%                              | -43%   | -17%   | -27%   |
| Haciaba             | -28%                         | -45%   | -54%   | -70%   | -5%                               | -30%   | -39%   | -45%   |
| Chouly              | -25%                         | -41%   | -46%   | -55%   | -14%                              | -24%   | -37%   | -48%   |
| STATIONS            | Quantile Delta Mapping (QDM) |        |        |        | Model (RAW)                       |        |        |        |
|                     | RCP4.5                       | RCP4.5 | RCP8.5 | RCP8.5 | RCP4.5                            | RCP4.5 | RCP8.5 | RCP8.5 |
|                     | 2050                         | 2100   | 2050   | 2100   | 2050                              | 2100   | 2050   | 2100   |
| Bir Ouled Tahar     | -6%                          | -6%    | -20%   | -33%   | -19%                              | -19%   | -29%   | -38%   |
| Tikezal             | -37%                         | -43%   | -35%   | -33%   | -44%                              | -51%   | -41%   | -44%   |
| Larabaa Ouled Fares | -5%                          | 2%     | -11%   | -18%   | -18%                              | -22%   | -31%   | -35%   |
| Ammi Moussa         | -19%                         | -27%   | -26%   | -27%   | -12%                              | -18%   | -28%   | -30%   |
| Oued Lilli          | -7%                          | -13%   | -26%   | -27%   | -12%                              | -18%   | -28%   | -30%   |
| Djediouia           | -10%                         | 9%     | -22%   | -10%   | -11%                              | -19%   | -28%   | -29%   |
| Haciaba             | -5%                          | 15%    | -5%    | 98%    | -18%                              | -30%   | -51%   | -25%   |
| Chouly              | 37%                          | 17%    | 11%    | 0%     | -20%                              | -24%   | -31%   | -42%   |

**Table S4** Change in mean seasonal (Spring) precipitation projection in CMT basins from the baseline period (1975–2012).

| Spring              |                       |        |        |        |                                   |        |        |        |
|---------------------|-----------------------|--------|--------|--------|-----------------------------------|--------|--------|--------|
| STATIONS            | Quantile Mapping (QM) |        |        |        | Scaled Distribution Mapping (SDM) |        |        |        |
|                     | RCP4.5                | RCP4.5 | RCP8.5 | RCP8.5 | RCP4.5                            | RCP4.5 | RCP8.5 | RCP8.5 |
|                     | 2050                  | 2100   | 2050   | 2100   | 2050                              | 2100   | 2050   | 2100   |
| Bir Ouled Tahar     | -27%                  | -34%   | -13%   | -62%   | -27%                              | -19%   | 0%     | -41%   |
| Tikezal             | -82%                  | -58%   | -38%   | -68%   | -75%                              | -37%   | -17%   | -42%   |
| Larabaa Ouled Fares | -20%                  | -25%   | -9%    | -54%   | -16%                              | -19%   | 2%     | -37%   |
| Ammi Moussa         | -41%                  | -41%   | -19%   | -71%   | -16%                              | -23%   | -12%   | -49%   |
| Oued Lilli          | -33%                  | -41%   | -19%   | -71%   | -13%                              | -14%   | -8%    | -49%   |
| Djediouia           | -34%                  | -31%   | -19%   | -59%   | -32%                              | -32%   | -14%   | -40%   |
| Haciaba             | -65%                  | -74%   | -65%   | -94%   | -50%                              | -58%   | -50%   | -80%   |
| Chouly              | -47%                  | -54%   | -43%   | -79%   | -34%                              | -40%   | -29%   | -66%   |

| STATIONS            | Quantile Delta Mapping (QDM) |        |        |        | Model (RAW) |        |        |        |
|---------------------|------------------------------|--------|--------|--------|-------------|--------|--------|--------|
|                     | RCP4.5                       | RCP4.5 | RCP8.5 | RCP8.5 | RCP4.5      | RCP4.5 | RCP8.5 | RCP8.5 |
|                     | 2050                         | 2100   | 2050   | 2100   | 2050        | 2100   | 2050   | 2100   |
| Bir Ouled Tahar     | -8%                          | -15%   | -5%    | -47%   | -22%        | -25%   | -9%    | -55%   |
| Tikezal             | -76%                         | -41%   | -20%   | -54%   | -78%        | -48%   | -28%   | -59%   |
| Larabaa Ouled Fares | -17%                         | -22%   | -5%    | -53%   | -31%        | -34%   | -21%   | -57%   |
| Ammi Moussa         | -25%                         | -31%   | -9%    | -61%   | -25%        | -31%   | -13%   | -62%   |
| Oued Lilli          | -23%                         | -31%   | -9%    | -61%   | -25%        | -31%   | -13%   | -62%   |
| Djediouia           | -27%                         | -27%   | -15%   | -55%   | -29%        | -33%   | -19%   | -58%   |
| Haciaba             | 69%                          | 75%    | 100%   | 17%    | -31%        | -35%   | -22%   | -64%   |
| Chouly              | 18%                          | 8%     | 23%    | -23%   | -35%        | -38%   | -25%   | -63%   |

**Table S5** Change in mean seasonal (Summer) precipitation projection in CMT basins from the baseline period (1975–2012).

| STATIONS            | Summer<br>Quantile Mapping (QM) |        |        |        | Summer<br>Scaled Distribution Mapping (SDM) |        |        |        |
|---------------------|---------------------------------|--------|--------|--------|---------------------------------------------|--------|--------|--------|
|                     | RCP4.5                          | RCP4.5 | RCP8.5 | RCP8.5 | RCP4.5                                      | RCP4.5 | RCP8.5 | RCP8.5 |
|                     | 2050                            | 2100   | 2050   | 2100   | 2050                                        | 2100   | 2050   | 2100   |
| Bir Ouled Tahar     | -21%                            | -29%   | -11%   | -24%   | 38%                                         | 21%    | 42%    | 35%    |
| Tikezal             | -3%                             | -16%   | 2%     | -9%    | 43%                                         | 37%    | 58%    | 44%    |
| Larabaa Ouled Fares | -24%                            | 8%     | 17%    | 7%     | 14%                                         | 60%    | 36%    | 28%    |
| Ammi Moussa         | 85%                             | -17%   | 17%    | -32%   | 10%                                         | -2%    | -9%    | 3%     |
| Oued Lilli          | -34%                            | -37%   | -31%   | -47%   | 14%                                         | 9%     | -25%   | -3%    |
| Djediouia           | 91%                             | 52%    | -24%   | -6%    | 93%                                         | 98%    | 12%    | 88%    |
| Haciaba             | 46%                             | 99%    | 84%    | 85%    | 88%                                         | 78%    | 83%    | 85%    |
| Chouly              | -29%                            | -28%   | 5%     | -2%    | -12%                                        | -5%    | 14%    | 20%    |

  

| STATIONS            | Quantile Delta Mapping (QDM) |        |        |        | Model (RAW) |        |        |        |
|---------------------|------------------------------|--------|--------|--------|-------------|--------|--------|--------|
|                     | RCP4.5                       | RCP4.5 | RCP8.5 | RCP8.5 | RCP4.5      | RCP4.5 | RCP8.5 | RCP8.5 |
|                     | 2050                         | 2100   | 2050   | 2100   | 2050        | 2100   | 2050   | 2100   |
| Bir Ouled Tahar     | 36%                          | 25%    | 43%    | 28%    | -5%         | -15%   | 7%     | -6%    |
| Tikezal             | 49%                          | 47%    | 56%    | 44%    | 11%         | 0%     | 19%    | 0%     |
| Larabaa Ouled Fares | 50%                          | 3%     | 12%    | 1%     | 22%         | 30%    | 26%    | 13%    |
| Ammi Moussa         | 98%                          | 21%    | 5%     | -4%    | 3%          | -15%   | -17%   | -22%   |
| Oued Lilli          | 21%                          | -4%    | 8%     | -4%    | 3%          | -15%   | -17%   | -22%   |
| Djediouia           | 92%                          | 65%    | -4%    | 7%     | 88%         | 72%    | 2%     | 37%    |
| Haciaba             | 73%                          | 90%    | 73%    | 53%    | 59%         | 78%    | 77%    | 53%    |
| Chouly              | 24%                          | 32%    | 26%    | 35%    | -18%        | -10%   | 3%     | -4%    |

### Streamflow projected season

**Table S6** Change in mean seasonal (Autumn) projected streamflow in CMT basins from the baseline period (1975–2012).

| STATIONS            | Autumn                |        |        |        |                                   |        |        |        |
|---------------------|-----------------------|--------|--------|--------|-----------------------------------|--------|--------|--------|
|                     | Quantile Mapping (QM) |        |        |        | Scaled Distribution Mapping (SDM) |        |        |        |
|                     | RCP4.5                | RCP4.5 | RCP8.5 | RCP8.5 | RCP4.5                            | RCP4.5 | RCP8.5 | RCP8.5 |
|                     | 2050                  | 2100   | 2050   | 2100   | 2050                              | 2100   | 2050   | 2100   |
| Bir Ouled Tahar     | 20%                   | -94%   | -93%   | -84%   | 12%                               | -91%   | -41%   | -85%   |
| Tikezal             | -91%                  | -92%   | -91%   | -92%   | -89%                              | -91%   | -68%   | -89%   |
| Larabaa Ouled Fares | -8%                   | -13%   | -9%    | -35%   | -10%                              | -10%   | -5%    | -3%    |
| Ammi Moussa         | -59%                  | -60%   | -45%   | -64%   | -52%                              | -53%   | -39%   | -45%   |
| Oued Lilli          | -17%                  | -18%   | -25%   | -42%   | 10%                               | 4%     | -12%   | -13%   |
| Djediouia           | -75%                  | -71%   | -66%   | -87%   | -87%                              | -78%   | -57%   | -30%   |
| Haciaba             | -84%                  | -80%   | -83%   | -82%   | -81%                              | -78%   | -82%   | -81%   |
| Chouly              | -68%                  | -85%   | -85%   | -92%   | -73%                              | -77%   | -81%   | -87%   |

  

| STATIONS            | Quantile Delta Mapping (QDM) |        |        |        | Model (RAW) |        |        |        |
|---------------------|------------------------------|--------|--------|--------|-------------|--------|--------|--------|
|                     | RCP4.5                       | RCP4.5 | RCP8.5 | RCP8.5 | RCP4.5      | RCP4.5 | RCP8.5 | RCP8.5 |
|                     | 2050                         | 2100   | 2050   | 2100   | 2050        | 2100   | 2050   | 2100   |
|                     | 2050                         | 2100   | 2050   | 2100   | 2050        | 2100   | 2050   | 2100   |
| Bir Ouled Tahar     | 70%                          | 18%    | -1%    | -78%   | 33%         | -97%   | -96%   | -97%   |
| Tikezal             | -90%                         | -91%   | -89%   | -91%   | -91%        | -97%   | -95%   | -97%   |
| Larabaa Ouled Fares | -4%                          | -9%    | -6%    | -32%   | -6%         | -23%   | -41%   | -41%   |
| Ammi Moussa         | -53%                         | -53%   | -36%   | -56%   | -46%        | -54%   | -45%   | -56%   |
| Oued Lilli          | -5%                          | -6%    | -12%   | -30%   | 16%         | 4%     | -19%   | -30%   |
| Djediouia           | -71%                         | -90%   | -72%   | -84%   | -45%        | -89%   | -78%   | -95%   |
| Haciaba             | -64%                         | -56%   | -58%   | -56%   | -78%        | -77%   | -79%   | -77%   |
| Chouly              | 52%                          | -20%   | -87%   | -75%   | -80%        | -77%   | -81%   | -89%   |

**Table S7** Change in mean seasonal (Winter) projected streamflow in CMT basins from the baseline period (1975–2012).

| STATIONS            | Winter                |        |        |        |                                   |        |        |        |
|---------------------|-----------------------|--------|--------|--------|-----------------------------------|--------|--------|--------|
|                     | Quantile Mapping (QM) |        |        |        | Scaled Distribution Mapping (SDM) |        |        |        |
|                     | RCP4.5                | RCP4.5 | RCP8.5 | RCP8.5 | RCP4.5                            | RCP4.5 | RCP8.5 | RCP8.5 |
|                     | 2050                  | 2100   | 2050   | 2100   | 2050                              | 2100   | 2050   | 2100   |
| Bir Ouled Tahar     | -26%                  | -14%   | -72%   | -18%   | -21%                              | -53%   | -10%   | -44%   |
| Tikezal             | -89%                  | -90%   | 4%     | 67%    | -31%                              | -63%   | 105%   | 38%    |
| Larabaa Ouled Fares | -20%                  | -10%   | -26%   | -28%   | -47%                              | -28%   | -31%   | -43%   |
| Ammi Moussa         | -29%                  | -29%   | -7%    | -28%   | -32%                              | -33%   | 3%     | -14%   |
| Oued Lilli          | -23%                  | -11%   | -28%   | -29%   | -17%                              | -28%   | -14%   | -28%   |
| Djediouia           | 60%                   | 29%    | 71%    | 83%    | -21%                              | 30%    | 66%    | 48%    |
| Haciaba             | 21%                   | -4%    | -46%   | -46%   | 46%                               | 29%    | -13%   | -4%    |
| Chouly              | -22%                  | -33%   | -39%   | -84%   | -13%                              | 13%    | -42%   | -88%   |

  

| STATIONS | Quantile Delta Mapping (QDM) |        |        |        | Model (RAW) |        |        |        |
|----------|------------------------------|--------|--------|--------|-------------|--------|--------|--------|
|          | RCP4.5                       | RCP4.5 | RCP8.5 | RCP8.5 | RCP4.5      | RCP4.5 | RCP8.5 | RCP8.5 |
|          | 2050                         | 2100   | 2050   | 2100   | 2050        | 2100   | 2050   | 2100   |
|          | 2050                         | 2100   | 2050   | 2100   | 2050        | 2100   | 2050   | 2100   |

|                     | 2050 | 2100 | 2050 | 2100 | 2050 | 2100 | 2050 | 2100 |
|---------------------|------|------|------|------|------|------|------|------|
| Bir Ouled Tahar     | -3%  | 46%  | 8%   | 4%   | 58%  | -13% | -38% | -84% |
| Tikezal             | -29% | -80% | 105% | 158% | -86% | -90% | 53%  | -36% |
| Larabaa Ouled Fares | -16% | -6%  | -22% | -25% | -28% | -28% | -74% | -40% |
| Ammi Moussa         | -22% | -22% | 8%   | -14% | -11% | -8%  | -2%  | -31% |
| Oued Lilli          | -20% | -22% | -20% | -20% | -15% | 1%   | -26% | -35% |
| Djediouia           | 84%  | -48% | 52%  | 113% | 55%  | 63%  | 21%  | -8%  |
| Haciaba             | 96%  | 96%  | 96%  | 96%  | 54%  | 29%  | -15% | 37%  |
| Chouly              | 275% | 177% | -51% | -7%  | -38% | -9%  | -33% | -85% |

**Table S8** Change in mean seasonal (Spring) projected streamflow in CMT basins from the baseline period (1975–2012).

| Spring              |                       |        |        |        |                                   |        |        |        |
|---------------------|-----------------------|--------|--------|--------|-----------------------------------|--------|--------|--------|
| STATIONS            | Quantile Mapping (QM) |        |        |        | Scaled Distribution Mapping (SDM) |        |        |        |
|                     | RCP4.5                | RCP4.5 | RCP8.5 | RCP8.5 | RCP4.5                            | RCP4.5 | RCP8.5 | RCP8.5 |
|                     | 2050                  | 2100   | 2050   | 2100   | 2050                              | 2100   | 2050   | 2100   |
| Bir Ouled Tahar     | -2%                   | 30%    | 37%    | -62%   | -7%                               | 50%    | 10%    | -40%   |
| Tikezal             | -94%                  | -93%   | -48%   | -94%   | -92%                              | -1%    | 39%    | -28%   |
| Larabaa Ouled Fares | 48%                   | 41%    | 65%    | -13%   | 54%                               | 48%    | 91%    | 18%    |
| Ammi Moussa         | 8%                    | 10%    | 13%    | -75%   | 26%                               | 36%    | 6%     | -51%   |
| Oued Lilli          | -50%                  | -49%   | -32%   | -77%   | -37%                              | -40%   | -29%   | -61%   |
| Djediouia           | -62%                  | -23%   | 58%    | -54%   | -83%                              | -35%   | -32%   | -59%   |
| Haciaba             | -79%                  | -86%   | -79%   | -92%   | -72%                              | -81%   | -75%   | -85%   |
| Chouly              | -87%                  | -73%   | -67%   | -97%   | -79%                              | -63%   | -60%   | -98%   |

  

| STATIONS            | Quantile Delta Mapping (QDM) |        |        |        | Model (RAW) |        |        |        |
|---------------------|------------------------------|--------|--------|--------|-------------|--------|--------|--------|
|                     | RCP4.5                       | RCP4.5 | RCP8.5 | RCP8.5 | RCP4.5      | RCP4.5 | RCP8.5 | RCP8.5 |
|                     | 2050                         | 2100   | 2050   | 2100   | 2050        | 2100   | 2050   | 2100   |
| Bir Ouled Tahar     | 35%                          | 1%     | 45%    | -48%   | -67%        | 31%    | 47%    | -11%   |
| Tikezal             | -91%                         | -58%   | -4%    | -92%   | -94%        | -86%   | -9%    | -78%   |
| Larabaa Ouled Fares | 54%                          | 46%    | 72%    | -11%   | 28%         | 22%    | -10%   | -19%   |
| Ammi Moussa         | 16%                          | -66%   | 31%    | -66%   | 31%         | 36%    | 20%    | -66%   |
| Oued Lilli          | -42%                         | -37%   | -16%   | -69%   | -43%        | -36%   | -28%   | -70%   |
| Djediouia           | -52%                         | -87%   | 37%    | -41%   | -61%        | -64%   | -32%   | -86%   |
| Haciaba             | -42%                         | -47%   | -35%   | -45%   | -69%        | -71%   | -66%   | -95%   |
| Chouly              | 35%                          | 1%     | -77%   | -83%   | -90%        | -67%   | -55%   | -97%   |

**Table S9** Change in mean seasonal (Summer) projected streamflow in CMT basins from the baseline period (1975–2012).

| Summer   |                       |        |        |        |                                   |        |        |        |
|----------|-----------------------|--------|--------|--------|-----------------------------------|--------|--------|--------|
| STATIONS | Quantile Mapping (QM) |        |        |        | Scaled Distribution Mapping (SDM) |        |        |        |
|          | RCP4.5                | RCP4.5 | RCP8.5 | RCP8.5 | RCP4.5                            | RCP4.5 | RCP8.5 | RCP8.5 |

|                     | 2050 | 2100 | 2050 | 2100 | 2050 | 2100 | 2050 | 2100 |
|---------------------|------|------|------|------|------|------|------|------|
| Bir Ouled Tahar     | -72% | 109% | -71% | -77% | -55% | -49% | -46% | -57% |
| Tikezal             | -78% | -87% | -78% | -87% | -70% | -78% | -70% | -78% |
| Larabaa Ouled Fares | -56% | -39% | -39% | -35% | -34% | -6%  | -21% | -24% |
| Ammi Moussa         | 168% | 79%  | 43%  | -15% | 181% | 134% | 12%  | 25%  |
| Oued Lilli          | 14%  | 12%  | 25%  | -26% | 93%  | 58%  | 75%  | 29%  |
| Djediouia           | -90% | -90% | -95% | -95% | -90% | -90% | -94% | -90% |
| Haciaba             | -72% | -63% | -63% | -69% | -61% | -65% | -59% | -65% |
| Chouly              | -99% | -57% | -99% | -99% | -99% | -59% | -99% | -99% |

| STATIONS            | Quantile Delta Mapping (QDM) |        |        |        | Model (RAW) |        |        |        |
|---------------------|------------------------------|--------|--------|--------|-------------|--------|--------|--------|
|                     | RCP4.5                       | RCP4.5 | RCP8.5 | RCP8.5 | RCP4.5      | RCP4.5 | RCP8.5 | RCP8.5 |
|                     | 2050                         | 2100   | 2050   | 2100   | 2050        | 2100   | 2050   | 2100   |
| Bir Ouled Tahar     | -58%                         | 98%    | 60%    | -63%   | -93%        | 117%   | 120%   | 29%    |
| Tikezal             | -70%                         | -78%   | -70%   | -78%   | -90%        | -90%   | -90%   | -90%   |
| Larabaa Ouled Fares | -12%                         | -42%   | -32%   | -38%   | -29%        | -26%   | 143%   | -33%   |
| Ammi Moussa         | 214%                         | 137%   | 28%    | 17%    | 154%        | 110%   | 3%     | -3%    |
| Oued Lilli          | 37%                          | 36%    | 48%    | -1%    | -62%        | -68%   | -69%   | -71%   |
| Djediouia           | -90%                         | -90%   | -95%   | -94%   | -91%        | -92%   | -95%   | -94%   |
| Haciaba             | -49%                         | -37%   | -35%   | -55%   | -61%        | -57%   | -57%   | -61%   |
| Chouly              | -99%                         | -35%   | -99%   | -99%   | -99%        | -59%   | -99%   | -99%   |
